# Supplementary material
Source: MDPI journal article supplement (https://www.mdpi.com/2071-1050/14/10/5988)
Supplement: s1 [file s1]

# Integrative Sustainability Analysis of European Pig Farms: Development of a Multi Criteria Assessment Tool

Antonia Katharina Ruckli <sup>1,\*†</sup>, Stefan Josef Hörtenhuber <sup>1,\*†</sup>, Paolo Ferrari <sup>2</sup>, Jonathan Guy <sup>3</sup>, Juliane Helmerichs <sup>4</sup>, Robert Hoste <sup>5</sup>, Carmen Hubbard <sup>3</sup>, Nadja Kasperczyk <sup>6</sup>, Christine Leeb <sup>1</sup>, Agata Malak-Rawlikowska <sup>7</sup>, Anna Valros <sup>8</sup> and Sabine Dippel <sup>5</sup>

- <sup>1</sup> Division of Livestock Sciences, Department of Sustainable Agricultural Systems, University of Natural Resources and Life Sciences, Gregor-Mendel-Str. 33, 1180 Vienna, Austria; christine.leeb@boku.ac.at
- <sup>2</sup> Centro Ricerche Produzioni Animali—C.R.P.A. S.p.A., 42121 Reggio Emilia, Italy; p.ferrari@crpa.it
- <sup>3</sup> Food and Rural Development, School of Agriculture, Newcastle University, Kings Road, Newcastle upon Tyne NE1 7RU, UK; jonathan.guy@newcastle.ac.uk (J.G.); carmen.hubbard@newcastle.ac.uk (C.H.)
- <sup>4</sup> Friedrich-Loeffler-Institut, Dörnbergstr. 25/27, 29223 Celle, Germany; helmerichs.ju@gmail.com (J.H.); sabine.dippel@fli.de (S.D.)
- <sup>5</sup> Wageningen Economic Research, Wageningen University & Research, P.O. Box 35, 6700AA Wageningen, The Netherlands; robert.hoste@wur.nl
- <sup>6</sup> Professur für ökologischen Landbau, Justus-Liebig-Universität Gießen, Karl-Glöckner-Str. 21 C, 35394 Gießen, Germany; nadja.kasperczyk@agrار.uni-giessen.de
- <sup>7</sup> Institute of Economics and Finance, Warsaw University of Life Sciences, 02-787 Warsaw, Poland; agata\_malak\_rawlikowska@sggw.edu.pl
- <sup>8</sup> Department of Production Animal Medicine, Faculty of Veterinary Medicine, University of Helsinki, P.O. Box 57, FI-00100 Helsinki, Finland; anna.valros@helsinki.fi
- \* Correspondence: antonia.ruckli@bfh.ch (A.K.R.); stefan.hoertenhuber@boku.ac.at (S.J.H.)
- † These authors contributed equally to this work.

**Supplementary Material Table S1: Allocated weights of sub-themes within themes and the number of indicators per subtheme for the economic dimension and the three farm types.**

| Economy                           | Breeding farms |              | Finishing farms |              | Breeding-to-finishing farms |              |
|-----------------------------------|----------------|--------------|-----------------|--------------|-----------------------------|--------------|
|                                   | Weight         | N indicators | Weight          | N indicators | Weight                      | N indicators |
| <b>ECO1: Technical efficiency</b> |                |              |                 |              |                             |              |
| Feed Efficiency                   | -              | -            | 0.54            | 1            | 0.38                        | 1            |
| Reproductive Efficiency           | 0.48           | 6            | -               | -            | 0.30                        | 6            |
| Health Management                 | 0.52           | 4            | 0.46            | 4            | 0.32                        | -            |
| <b>ECO2: Economic resilience</b>  |                |              |                 |              |                             |              |
| Entrepreneurship*                 | -              | -            | -               | -            | -                           | -            |
| Profitability*                    | -              | -            | -               | -            | -                           | -            |
| Risk Management                   | 0.57           | 1            | 0.57            | 1            | 0.57                        | 2            |
| Labour Productivity               | 0.43           | 3            | 0.43            | 3            | 0.43                        | 3            |
| Resilience of Resources*          | -              | -            | -               | -            | -                           | -            |

N = number. \*Excluded from the present study due to the data availability issues. For complete economic protocol see : Malak-Rawlikowska, A.; Gębska, M.; Hoste, R.; Leeb, C.; Montanari, C.; Wallace, M.; de Roest, K. Developing a Methodology for Aggregated Assessment of the Economic Sustainability of Pig Farms. *Energies* 2021, 14, doi:10.3390/en14061760.

**Supplementary Material Table S2: Allocated weights of sub-themes within themes and the number of indicators per subtheme for the environmental dimension. Weights were the same across all farm types.**

| Environment                        | All farms |              |
|------------------------------------|-----------|--------------|
|                                    | Weights   | N indicators |
| <b>ENV1: Atmosphere</b>            |           |              |
| Greenhouse gas emissions           | 0.50      | 15           |
| Air quality                        | 0.50      | 8            |
| <b>ENV2: Water</b>                 |           |              |
| Water Withdrawal                   | 0.50      | 6            |
| Water Quality                      | 0.50      | 18           |
| <b>ENV3: Soil</b>                  |           |              |
| Soil Quality                       | 0.50      | 19           |
| Land Degradation                   | 0.50      | 16           |
| <b>ENV4: Biodiversity</b>          |           |              |
| Ecosystem Diversity                | 0.33      | 17           |
| Species Diversity                  | 0.33      | 16           |
| Genetic Diversity                  | 0.33      | 6            |
| <b>ENV5: Material &amp; Energy</b> |           |              |
| Material use                       | 0.33      | 14           |
| Energy use                         | 0.33      | 16           |
| Waste Reduction                    | 0.33      | 3            |

N = number

**Supplementary Material Table S3: Allocated weights of sub-themes within themes and the number of indicators per subtheme for the social dimension. Weights were the same across all farm types.**

| Social wellbeing                                                              | All farms |              |
|-------------------------------------------------------------------------------|-----------|--------------|
|                                                                               | Weights   | N indicators |
| <b>SOC1: Decent Livelihoods</b>                                               |           |              |
| Quality of life                                                               | 0.45      | 11           |
| Succession                                                                    | 0.15      | 1            |
| Capacity Building                                                             | 0.15      | 3            |
| Fair access to means of production                                            | 0.25      | 4            |
| <b>SOC2: Fair Trading Practices</b>                                           |           |              |
| Responsible buyers                                                            | 0.50      | 2            |
| Right of suppliers                                                            | 0.50      | 2            |
| <b>SOC3: Labour Rights</b>                                                    |           |              |
| Employment relations                                                          | 0.70      | 2            |
| Child labour                                                                  | 0.30      | 2            |
| <b>SOC4: Equality, non-discrimination, gender equality, vulnerable groups</b> |           |              |
| Non-discrimination                                                            | 0.45      | 3            |
| Gender equality                                                               | 0.30      | 1            |
| Vulnerable groups                                                             | 0.25      | 1            |
| <b>SOC5: Human health &amp; safety</b>                                        |           |              |
| Safety and health training/safety at workplace                                | 1.00      | 4            |
| <b>SOC6: Good governance</b>                                                  |           |              |
| (Negative) Impact on society and environment                                  | 0.50      | 3            |
| Positive contribution                                                         | 0.50      | 3            |

N = number

**Supplementary Material Table S4: Allocated weights of sub-themes within themes and the number of indicators per subtheme for the animal health and welfare dimension. Weights were distinguished for farm type and farms with and without pasture access as well as mixed systems.**

| Animal health and welfare                                 | Breeding farms |              | Finishing farms |              | Breeding-to-finishing farms |              |
|-----------------------------------------------------------|----------------|--------------|-----------------|--------------|-----------------------------|--------------|
|                                                           | Weights        | N indicators | Weights         | N indicators | Weights                     | N indicators |
| <b>AHW1: Absence of hunger and thirst</b>                 |                |              |                 |              |                             |              |
| Clinical findings                                         | 0.29           | 3            | -               | -            | 0.29                        | 3            |
| Feeding system*                                           | -              | -            | -               | -            | -                           | -            |
| Water provision                                           | 0.29           | 5            | 0.67            | 4            | 0.29                        | 5            |
| Roughage                                                  | 0.14           | 1            | 0.33            | 1            | 0.14                        | 1            |
| Management                                                | 0.29           | 3            | -               | -            | 0.29                        | 3            |
| <b>AHW2: Pig comfort</b>                                  |                |              |                 |              |                             |              |
| Clinical findings                                         | 0.12           | 4            | 0.16            | 2            | 0.12                        | 4            |
| Creep area                                                | 0.12           | 1            | -               | -            | 0.12                        | 1            |
| Floor quality                                             | 0.19           | 5            | 0.25            | 5            | 0.19                        | 5            |
| Space allowance                                           | 0.20           | 2            | 0.27            | 2            | 0.20                        | 2            |
| Hospitalisation                                           | 0.12           | 1            | 0.16            | 1            | 0.12                        | 1            |
| Husbandry system                                          | 0.12           | 2            | -               | -            | 0.12                        | 2            |
| Treatments                                                | 0.12           | 2            | 0.16            | 1            | 0.12                        | 2            |
| Slaughter remarks*                                        | -              | -            | -               | -            | -                           | -            |
| <b>AHW3: Absence of injuries and disease</b>              |                |              |                 |              |                             |              |
| Biosecurity                                               | 0.14           | 3            | 0.14            | 2            | 0.14                        | 3            |
| Clinical findings                                         | 0.29           | 11           | 0.29            | 7            | 0.29                        | 11           |
| Hospitalisation                                           | 0.14           | 2            | 0.14            | 2            | 0.14                        | 2            |
| Mortality                                                 | 0.29           | 1            | 0.29            | 1            | 0.29                        | 1            |
| Treatments                                                | 0.14           | 4            | 0.14            | 2            | 0.14                        | 4            |
| Slaughter remarks*                                        | -              | -            | -               | -            | -                           | -            |
| <b>AHW4: Absence of pain by management</b>                |                |              |                 |              |                             |              |
| Clinical findings                                         | 0.30           | 5            | 0.40            | 4            | 0.30                        | 5            |
| Hospitalisation                                           | 0.20           | 1            | 0.27            | 1            | 0.20                        | 1            |
| Mutilations                                               | 0.25           | 3            | 0.33            | 1            | 0.25                        | 3            |
| Castration                                                | 0.25           | 2            | -               | -            | 0.25                        | 2            |
| <b>AHW5: Possibility to perform appropriate behaviour</b> |                |              |                 |              |                             |              |
| Behaviour                                                 | 0.21           | 4            | 0.27            | 4            | 0.21                        | 4            |
| Clinical findings                                         | 0.12           | 6            | 0.15            | 5            | 0.12                        | 6            |
| Enrichment                                                | 0.17           | 5            | 0.22            | 4            | 0.17                        | 5            |
| Pasture                                                   | 0.12           | 3            | 0.15            | 3            | 0.12                        | 3            |
| Space allowance                                           | 0.17           | 2            | 0.22            | 2            | 0.17                        | 2            |
| Restricted normal behaviour                               | 0.22           | 6            | -               | -            | 0.22                        | 6            |
| Slaughter remarks*                                        | -              | -            | -               | -            | -                           | -            |
| <b>AHW6: Good human-animal relationship</b>               |                |              |                 |              |                             |              |
| Negative characteristics                                  | 0.30           | 2            | 0.30            | 2            | 0.30                        | 2            |
| One welfare                                               | 0.30           | 2            | 0.30            | 2            | 0.30                        | 2            |
| Positive characteristics                                  | 0.40           | 4            | 0.40            | 4            | 0.40                        | 4            |

N = number. \*Excluded from the present study due to the data availability issues.

**Supplementary Material Table S5: Economical sustainability performance (min, median, max) of breeding, finishing and breeding-to-finishing farms on sub-theme level.**

|                                   | Breeding farms |    |     | Finishing farms |    |     | Breeding-to-finishing farms |    |     |
|-----------------------------------|----------------|----|-----|-----------------|----|-----|-----------------------------|----|-----|
|                                   | Min            | M  | Max | Min             | M  | Max | Min                         | M  | Max |
| Number of farms                   |                | 13 |     |                 | 23 |     |                             | 27 |     |
| <b>ECO1: Technical efficiency</b> |                |    |     |                 |    |     |                             |    |     |
| Feed Efficiency                   | .              | .  | .   | 0               | 49 | 100 | 0                           | 56 | 100 |
| Reproductive Efficiency           | 32             | 46 | 56  | .               | .  | .   | 14                          | 35 | 64  |
| Health Management                 | 25             | 57 | 100 | 18              | 80 | 100 | 14                          | 64 | 98  |
| <b>ECO2: Economic resilience</b>  |                |    |     |                 |    |     |                             |    |     |
| Risk Management                   | 0              | 40 | 100 | 0               | 89 | 100 | 0                           | 67 | 100 |
| Labour Productivity               | 0              | 18 | 59  | 0               | 22 | 100 | 0                           | 6  | 70  |
| Entrepreneurship*                 | -              | -  | -   | -               | -  | -   | -                           | -  | -   |
| Profitability*                    | -              | -  | -   | -               | -  | -   | -                           | -  | -   |
| Resilience of Resources*          | -              | -  | -   | -               | -  | -   | -                           | -  | -   |

\*Excluded from the present study due to the data availability issues.

**Supplementary Material Table S6: Environmental sustainability performance (min, median, max) of breeding, finishing and breeding-to-finishing farms on theme and sub-theme level.**

|                                    | Breeding farms |     |     | Finishing farms |    |     | Breeding-to-finishing farms |     |     |
|------------------------------------|----------------|-----|-----|-----------------|----|-----|-----------------------------|-----|-----|
|                                    | Min            | M   | Max | Min             | M  | Max | Min                         | M   | Max |
| Number of farms                    |                | 13  |     |                 | 23 |     |                             | 27  |     |
| <b>ENV1: Atmosphere</b>            |                |     |     |                 |    |     |                             |     |     |
| Greenhouse gas emissions           | 43             | 57  | 68  | 30              | 51 | 82  | 34                          | 59  | 71  |
| Air quality                        | 29             | 51  | 81  | 23              | 43 | 86  | 18                          | 50  | 92  |
| <b>ENV2: Water</b>                 |                |     |     |                 |    |     |                             |     |     |
| Water Withdrawal                   | 67             | 100 | 100 | 67              | 84 | 100 | 42                          | 100 | 100 |
| Water Quality                      | 50             | 66  | 71  | 51              | 66 | 81  | 49                          | 62  | 77  |
| <b>ENV3: Soil</b>                  |                |     |     |                 |    |     |                             |     |     |
| Soil Quality                       | 35             | 54  | 66  | 30              | 54 | 73  | 20                          | 50  | 73  |
| Land Degradation                   | 43             | 64  | 77  | 47              | 63 | 83  | 41                          | 61  | 85  |
| <b>ENV4: Biodiversity</b>          |                |     |     |                 |    |     |                             |     |     |
| Ecosystem Diversity                | 49             | 58  | 68  | 42              | 58 | 83  | 42                          | 56  | 73  |
| Species Diversity                  | 47             | 51  | 65  | 35              | 51 | 77  | 34                          | 45  | 68  |
| Genetic Diversity                  | 7              | 27  | 81  | 5               | 27 | 64  | 1                           | 25  | 68  |
| <b>ENV5: Material &amp; Energy</b> |                |     |     |                 |    |     |                             |     |     |
| Material use                       | 44             | 71  | 81  | 33              | 67 | 79  | 31                          | 67  | 89  |
| Energy use                         | 32             | 48  | 60  | 20              | 50 | 84  | 34                          | 57  | 84  |
| Waste Reduction                    | 83             | 87  | 98  | 80              | 87 | 100 | 72                          | 85  | 100 |

**Supplementary Material Table S7: Social sustainability performance (min, median, max) of breeding, finishing and breeding-to-finishing farms on theme and sub-theme level.**

|                                                                               | Breeding farms |     |     | Finishing farms |     |     | Breeding-to-finishing farms |     |     |
|-------------------------------------------------------------------------------|----------------|-----|-----|-----------------|-----|-----|-----------------------------|-----|-----|
|                                                                               | Min            | M   | Max | Min             | M   | Max | Min                         | M   | Max |
| Number of farms                                                               |                | 13  |     |                 | 23  |     |                             | 27  |     |
| <b>SOC1: Decent Livelihoods</b>                                               |                |     |     |                 |     |     |                             |     |     |
| Quality of life                                                               | 37             | 62  | 83  | 34              | 64  | 82  | 44                          | 70  | 81  |
| Succession                                                                    | 0              | 100 | 100 | 0               | 100 | 100 | 0                           | 100 | 100 |
| Capacity Building                                                             | 0              | 60  | 100 | 40              | 75  | 100 | 13                          | 75  | 100 |
| Fair access to means of production                                            | 31             | 56  | 100 | 44              | 75  | 100 | 25                          | 69  | 100 |
| <b>SOC2: Fair Trading Practices</b>                                           |                |     |     |                 |     |     |                             |     |     |
| Responsible buyers                                                            | 0              | 55  | 85  | 15              | 70  | 100 | 15                          | 55  | 100 |
| Right of suppliers                                                            | 0              | 50  | 88  | 0               | 63  | 100 | 0                           | 38  | 75  |
| <b>SOC3: Labour Rights</b>                                                    |                |     |     |                 |     |     |                             |     |     |
| Employment relations                                                          | 40             | 100 | 100 | 40              | 100 | 100 | 40                          | 100 | 100 |
| Child labour                                                                  | 30             | 100 | 100 | 23              | 100 | 100 | 15                          | 100 | 100 |
| <b>SOC4: Equality, non-discrimination, gender equality, vulnerable groups</b> |                |     |     |                 |     |     |                             |     |     |
| Non-discrimination                                                            | 0              | 50  | 100 | 25              | 50  | 100 | 0                           | 75  | 100 |
| Gender equality                                                               | 0              | 75  | 100 | 0               | 50  | 100 | 0                           | 100 | 100 |
| Vulnerable groups                                                             | 100            | 100 | 100 | 100             | 100 | 100 | 100                         | 100 | 100 |
| <b>SOC5: Human health &amp; safety</b>                                        |                |     |     |                 |     |     |                             |     |     |
| Safety and health training at workplace                                       | 56             | 88  | 100 | 63              | 91  | 100 | 38                          | 91  | 100 |
| <b>SOC6: Good governance</b>                                                  |                |     |     |                 |     |     |                             |     |     |
| (Negative) Impact on society and environment                                  | 65             | 80  | 100 | 30              | 85  | 100 | 65                          | 80  | 100 |
| Positive contribution                                                         | 8              | 68  | 100 | 9               | 66  | 93  | 24                          | 59  | 100 |

**Supplementary Material Table S8: Animal health and welfare sustainability performance (min, median, max) of breeding, finishing and breeding-to-finishing farms on theme and sub-theme level.**

|                                                                              | Breeding farms |     |     | Finishing farms |     |     | Breeding-to-finishing farms |     |     |
|------------------------------------------------------------------------------|----------------|-----|-----|-----------------|-----|-----|-----------------------------|-----|-----|
|                                                                              | Min            | M   | Max | Min             | M   | Max | Min                         | M   | Max |
| Number of farms                                                              |                | 13  |     |                 | 23  |     |                             | 27  |     |
| <b>AHW1: Absence of hunger and thirst</b>                                    |                |     |     |                 |     |     |                             |     |     |
| Clinical findings                                                            | 19             | 54  | 96  | .               | .   | .   | 12                          | 65  | 100 |
| Water provision                                                              | 56             | 69  | 88  | 26              | 60  | 100 | 46                          | 76  | 94  |
| Feeding system                                                               | 100            | 100 | 100 | 100             | 100 | 100 | 100                         | 100 | 100 |
| Roughage                                                                     | 0              | 40  | 80  | 0               | 0   | 100 | 0                           | 27  | 85  |
| Management                                                                   | 18             | 45  | 80  | .               | .   | .   | 13                          | 53  | 93  |
| Pasture                                                                      | 25             | 25  | 25  | .               | .   | .   | 38                          | 39  | 52  |
| <b>AHW2: Comfort (thermal, physical, when resting and during locomotion)</b> |                |     |     |                 |     |     |                             |     |     |
| Clinical findings                                                            | 48             | 71  | 87  | 9               | 85  | 100 | 37                          | 80  | 95  |
| Creep area                                                                   | 50             | 50  | 100 | .               | .   | .   | 50                          | 50  | 88  |
| Floor quality                                                                | 10             | 32  | 56  | 4               | 29  | 86  | 9                           | 24  | 67  |
| Space allowance                                                              | 3              | 10  | 39  | 8               | 34  | 69  | 8                           | 21  | 65  |
| Pasture                                                                      | 100            | 100 | 100 | .               | .   | .   | 100                         | 100 | 100 |
| Hospitalisation                                                              | 0              | 50  | 100 | 0               | 0   | 100 | 0                           | 33  | 100 |
| Husbandry system                                                             | 0              | 0   | 0   | .               | .   | .   | 0                           | 0   | 40  |
| Treatments                                                                   | 0              | 70  | 100 | 0               | 90  | 100 | 0                           | 80  | 100 |
| <b>AHW3: Absence of injuries and disease</b>                                 |                |     |     |                 |     |     |                             |     |     |
| Biosecurity                                                                  | 0              | 75  | 75  | 0               | 100 | 100 | 25                          | 75  | 100 |
| Clinical findings                                                            | 35             | 62  | 80  | 19              | 60  | 77  | 34                          | 68  | 93  |
| Hospitalisation                                                              | 9              | 56  | 100 | 0               | 56  | 100 | 0                           | 56  | 100 |
| Mortality                                                                    | 29             | 53  | 95  | 18              | 80  | 100 | 11                          | 69  | 100 |
| Pasture                                                                      | 0              | 0   | 0   | .               | .   | .   | 0                           | 0   | 50  |
| Treatments                                                                   | 5              | 71  | 100 | 0               | 90  | 100 | 0                           | 69  | 89  |
| <b>AHW4: Absence of pain by management</b>                                   |                |     |     |                 |     |     |                             |     |     |
| Clinical findings                                                            | 0              | 49  | 100 | 0               | 35  | 64  | 9                           | 48  | 100 |
| Hospitalisation                                                              | 17             | 67  | 100 | 0               | 100 | 100 | 0                           | 89  | 100 |
| Mutilations                                                                  | 41             | 79  | 100 | 0               | 0   | 100 | 43                          | 68  | 100 |
| Castration                                                                   | 0              | 33  | 100 | .               | .   | .   | 0                           | 50  | 100 |
| <b>AHW5: Possibility to perform appropriate behaviour</b>                    |                |     |     |                 |     |     |                             |     |     |
| Behaviour                                                                    | 40             | 57  | 80  | 32              | 58  | 96  | 42                          | 59  | 90  |
| Clinical findings                                                            | 4              | 40  | 92  | 7               | 45  | 71  | 18                          | 44  | 95  |
| Enrichment                                                                   | 17             | 51  | 68  | 0               | 64  | 91  | 0                           | 49  | 87  |
| Pasture                                                                      | 0              | 0   | 16  | 0               | 0   | 0   | 0                           | 0   | 50  |
| Space allowance                                                              | 3              | 10  | 39  | 8               | 34  | 69  | 8                           | 21  | 65  |
| Restricted normal behaviour                                                  | 36             | 56  | 78  | .               | .   | .   | 27                          | 61  | 98  |
| <b>AHW6: Good human-animal relationship</b>                                  |                |     |     |                 |     |     |                             |     |     |
| Negative characteristics                                                     | 25             | 100 | 100 | 38              | 88  | 100 | 38                          | 75  | 100 |
| One welfare                                                                  | 50             | 63  | 100 | 50              | 75  | 100 | 13                          | 75  | 100 |
| Positive characteristics                                                     | 50             | 81  | 100 | 44              | 69  | 100 | 50                          | 81  | 100 |

**Supplementary Material Table S9: Contribution of all economic indicators to the respective themes in percentage.**

|                                                       | Breeding farms | Breeding-to-finishing farms | Finishing farms |
|-------------------------------------------------------|----------------|-----------------------------|-----------------|
| <b>ECO1 Technical efficiency</b>                      |                |                             |                 |
| Feed conversion rate finishing pigs                   | -              | 38%                         | 54%             |
| Number of litters per sow                             | 3%             | 2%                          | -               |
| Number of piglets weaned per litter                   | 6%             | 4%                          | -               |
| Number of piglets weaned per sow                      | 25%            | 16%                         | -               |
| Age of piglets at weaning                             | 6%             | 4%                          | -               |
| Weight of piglets at weaning                          | 9%             | 5%                          | -               |
| Pre-weaning mortality rate                            | 21%            | 10%                         | -               |
| Post-weaning mortality rate                           | 20%            | 9%                          | -               |
| Sow mortality                                         | 10%            | 5%                          | -               |
| Mortality rate finishing pigs                         | -              | 9%                          | 46%             |
| Veterinary costs per sow*                             | -              | -                           | -               |
| Veterinary costs per finishing pig*                   | -              | -                           | -               |
| <b>ECO2 Economic resilience</b>                       |                |                             |                 |
| Percentage of rented land                             | 19%            | 19%                         | 19%             |
| Percentage of family labour                           | 38%            | 38%                         | 38%             |
| Kg of pig meat per Annual Working Unit                | -              | 21%                         | 31%             |
| Number of sows per Annual Working Unit                | 43%            | 14%                         | -               |
| Number of finishing pigs per Annual Working Unit      | -              | 8%                          | 12%             |
| Gross margin over feed costs per finishing pig*       | -              | -                           | -               |
| Gross margin over non-factor costs per finishing pig* | -              | -                           | -               |
| Gross margin over feed costs per sow*                 | -              | -                           | -               |
| Gross margin over non-factor costs per sow*           | -              | -                           | -               |
| Production non-factor costs per kg of pig meat*       | -              | -                           | -               |
| Bargaining power in the chain*                        | -              | -                           | -               |
| Horizontal cooperation between farmers*               | -              | -                           | -               |
| Degree of specialization*                             | -              | -                           | -               |
| Degree of modernity *                                 | -              | -                           | -               |
| Capital intensity *                                   | -              | -                           | -               |
| Investment potential*                                 | -              | -                           | -               |
| Innovation potential *                                | -              | -                           | -               |

\*Excluded from the present study due to the data availability issues.

**Supplementary Material Table S10: Contribution of all environmental indicators to the respective themes in percentage.**

| Indicators (scaled units)                                                                        | ENV1 | ENV2 | ENV3 | ENV4 | ENV5 |
|--------------------------------------------------------------------------------------------------|------|------|------|------|------|
| Greenhouse gas potential (kg CO <sub>2</sub> -eq kg <sup>-1</sup> BMNS)                          | 13%  |      |      |      |      |
| Greenhouse gas potential (kg CO <sub>2</sub> -eq ha <sup>-1</sup> )                              | 10%  |      |      |      |      |
| Acidification (g SO <sub>2</sub> -eq kg <sup>-1</sup> BMNS)                                      | 14%  |      |      |      |      |
| Acidification (g SO <sub>2</sub> -eq ha <sup>-1</sup> )                                          | 8%   |      |      |      |      |
| Eutrophication (g P-eq kg <sup>-1</sup> BMNS)                                                    |      | 8%   |      |      |      |
| Eutrophication (g P-eq kg <sup>-1</sup> ha <sup>-1</sup> )                                       |      | 8%   |      |      |      |
| Land use (ha kg <sup>-1</sup> BMNS)                                                              |      |      | 10%  |      | 3%   |
| Energy (MJ kg <sup>-1</sup> BMNS)                                                                |      |      |      |      | 7%   |
| Energy (MJ ha <sup>-1</sup> )                                                                    |      |      |      |      | 5%   |
| Certified feed                                                                                   | 7%   |      | 4%   |      |      |
| Energy-saving methods                                                                            | 4%   |      |      |      | 7%   |
| N - high precision fertilisation                                                                 | 7%   | 3%   | 2%   | 3%   | 7%   |
| N - fertilisation based on soil and plant analysis                                               | 5%   | 3%   | 2%   | 2%   | 8%   |
| Arable land not ploughed                                                                         | 2%   | 1%   | 10%  |      | 3%   |
| Leguminous crops/grassland                                                                       | 3%   |      | 5%   | 5%   |      |
| Conversion of permanent grassland into arable land                                               | 3%   | 3%   | 10%  | 4%   |      |
| Woodland on farm                                                                                 | 1%   | 1%   | 3%   | 12%  |      |
| Woodland deforested                                                                              | 5%   | 1%   | 6%   | 4%   | 1%   |
| Catch crops                                                                                      | 2%   | 3%   | 4%   | 4%   | 1%   |
| Ecological compensation area                                                                     | 1%   | 3%   | 3%   | 12%  | 1%   |
| Agricultural land on drained moorland                                                            | 2%   |      | 5%   | 8%   |      |
| Techniques for reducing emissions                                                                | 16%  | 3%   | 2%   |      |      |
| Application of mineral P- and K-fertilisers based on the results of soil or plant analysis       |      | 3%   | 5%   | 3%   | 7%   |
| (Proportion of) agricultural land with chemical synthetic insecticides / herbicides / fungicides |      | 3%   | 7%   | 9%   | 6%   |
| Average pesticide treatment frequency                                                            |      | 3%   | 5%   | 5%   | 6%   |
| Calculation of humus balances for farmland                                                       |      |      | 5%   | 2%   | 3%   |
| Water-saving technology in the barn                                                              |      | 17%  |      |      |      |
| Access to communal (tap) water with sufficient water supply in the pig barn                      |      | 3%   |      |      |      |
| Sufficient water supply or storage capacities                                                    |      | 10%  |      |      | 3%   |
| Field irrigation                                                                                 |      | 5%   |      |      | 2%   |
| Use of information about local precipitation and evaporation rate                                |      | 6%   |      |      | 2%   |
| Water-saving technology for irrigation of fields (e.g. drip irrigation)                          |      | 10%  |      |      | 4%   |
| Feeding GMO crops                                                                                |      |      |      | 8%   |      |
| On-farm cultivation of GMO crops                                                                 |      |      |      | 3%   |      |
| Cultivating and harvesting crops on riparian strips                                              |      | 3%   | 6%   | 8%   |      |
| Fertilisation or pesticide use on riparian strips                                                |      | 3%   |      |      |      |
| Access of animals (pigs, cows, sheep ect.) to surface water bodies and/or riparian strips        |      | 3%   | 3%   | 1%   |      |
| Slope of the paddock towards natural water bodies (which is not interrupted by a buffer strip)   |      | 3%   | 3%   |      |      |
| Growing rare or endangered agricultural crops                                                    |      |      |      | 6%   |      |
| Permanent grassland or pasture converted to arable land                                          |      |      |      |      | 1%   |
| Proportion of discarded inputs                                                                   |      |      |      |      | 27%  |
| Degraded land                                                                                    |      |      | 5%   |      |      |

BMNS = body mass net sold, CO<sub>2</sub>-eq = carbon dioxide equivalents; SO<sub>2</sub>-eq = sulphur dioxide equivalents; P-eq = phosphorous equivalents; MJ = megajoule.



**Supplementary Material Table S11: Influence of all social indicators to the respective themes in percentage.**

|                                                                                       | SOC1 | SOC2 | SOC3 | SOC4 | SOC5 | SOC6 |
|---------------------------------------------------------------------------------------|------|------|------|------|------|------|
| Job satisfaction                                                                      | 8%   |      |      |      |      |      |
| Motivation to be a pig farmer                                                         | 2%   |      |      |      |      |      |
| Demotivation                                                                          | 2%   |      |      |      |      |      |
| Workload                                                                              | 5%   |      |      |      |      |      |
| Working conditions                                                                    | 5%   |      |      |      |      |      |
| Level of stress                                                                       | 3%   |      |      |      |      |      |
| Health status                                                                         | 3%   |      |      |      |      |      |
| Leisure time with family, including holiday                                           | 6%   |      |      |      |      |      |
| Relationship with neighbours                                                          | 2%   |      |      |      |      |      |
| Farming as a main source of income                                                    | 7%   |      |      |      |      |      |
| Support in case of emergency                                                          | 2%   |      |      |      |      |      |
| Relevance/importance of succession                                                    | 15%  |      |      |      |      |      |
| Farmer's training (in relation to his/her business)                                   | 6%   |      |      |      |      |      |
| Other training opportunities (for family and workers, if any)                         | 5%   |      |      |      |      |      |
| Access to unpaid advisory services                                                    | 4%   |      |      |      |      |      |
| Land (owned or leased)                                                                | 6%   |      |      |      |      |      |
| Financial capital                                                                     | 6%   |      |      |      |      |      |
| Buildings and other farming equipment/facilities                                      | 6%   |      |      |      |      |      |
| Farming knowledge                                                                     | 6%   |      |      |      |      |      |
| Fairness of prices (buyers pay)                                                       |      | 30%  |      |      |      |      |
| Access to market information (e.g. price)                                             |      | 20%  |      |      |      |      |
| Fairness of prices (throughout supply chain)                                          |      | 25%  |      |      |      |      |
| Fairness of contracts/agreements with input suppliers                                 |      | 25%  |      |      |      |      |
| sufficient number of workers                                                          |      |      | 42%  |      |      |      |
| workers' understanding of their rights (e.g. wages and work conditions)               |      |      | 28%  |      |      |      |
| Employment relations: Children (under 16) involved on farm work?                      |      |      | 21%  |      |      |      |
| Children (under 16) involved on farm work at any time and interfering with school     |      |      | 9%   |      |      |      |
| Clear rules/guidelines regarding non-discrimination                                   |      |      |      | 11%  |      |      |
| If yes, are these rules/guidelines clearly specified and made available to all staff? |      |      |      | 11%  |      |      |
| Do all your employees have equal access to training opportunities?                    |      |      |      | 23%  |      |      |
| Gender Equality indicator                                                             |      |      |      | 30%  |      |      |
| Vulnerable Groups indicator                                                           |      |      |      | 25%  |      |      |
| Health and safety training provision for employees                                    |      |      |      |      | 25%  |      |
| Status of workplace (buildings, machinery etc.) regarding health and safety           |      |      |      |      | 25%  |      |
| Accident and injury rate on farm                                                      |      |      |      |      | 25%  |      |
| Provision of protective equipment to employees                                        |      |      |      |      | 25%  |      |
| Responsibility for negative environmental impacts                                     |      |      |      |      |      | 25%  |
| Risk level of polluting/contaminating the environment                                 |      |      |      |      |      | 15%  |
| Communication of risks to others (potentially affected)                               |      |      |      |      |      | 10%  |
| Positive contribution to local economy                                                |      |      |      |      |      | 18%  |
| Positive contribution to local environment                                            |      |      |      |      |      | 18%  |
| Positive contribution to local culture                                                |      |      |      |      |      | 15%  |

**Supplementary Material Table S12: Contribution of all animal health and welfare indicators to the respective themes in percentage (B = Breeding farms, F = Finishing farms, BF = Breeding-to-finishing farms). Part I**

|                                                           | AHW1 |     |     | AHW2 |    |     | AHW3 |    |    | AHW4 |     |    | AHW5 |    |    |
|-----------------------------------------------------------|------|-----|-----|------|----|-----|------|----|----|------|-----|----|------|----|----|
|                                                           | B    | F   | BF  | B    | F  | BF  | B    | F  | BF | B    | F   | BF | B    | F  | BF |
| <b>Clinical findings</b>                                  |      |     |     |      |    |     |      |    |    |      |     |    |      |    |    |
| Runts                                                     | 9%   |     | 9%  | 7%   |    | 7%  | 8%   | 0% | 8% |      |     |    |      |    |    |
| Thin sows                                                 | 9%   |     | 9%  |      |    |     | 1%   | 0% | 1% |      |     |    |      |    |    |
| Shoulder lesions                                          | 11%  |     | 11% | 1%   |    | 1%  | 2%   | 0% | 2% | 5%   | 0%  | 5% |      |    |    |
| Lameness                                                  |      |     |     | 2%   | 9% | 2%  | 3%   | 5% | 3% |      |     |    |      |    |    |
| Body lesions                                              |      |     |     | 2%   | 7% | 2%  | 2%   | 4% | 2% |      |     |    | 2%   | 3% | 2% |
| Ear lesions                                               |      |     |     |      |    |     | 2%   | 4% | 2% | 6%   | 10% | 6% | 2%   | 3% | 2% |
| Tail lesions                                              |      |     |     |      |    |     | 3%   | 5% | 3% | 9%   | 14% | 9% | 3%   | 4% | 3% |
| Shortened tail                                            |      |     |     |      |    |     | 1%   | 3% | 1% | 4%   | 7%  | 4% | 1%   | 2% | 1% |
| Stumps                                                    |      |     |     |      |    |     | 2%   | 3% | 2% | 5%   | 9%  | 5% | 2%   | 3% | 2% |
| Vulva lesions                                             |      |     |     |      |    |     | 1%   | 0% | 1% |      |     |    | 1%   | 0% | 1% |
| Ectoparasites                                             |      |     |     |      |    |     | 2%   | 4% | 2% |      |     |    |      |    |    |
| <b>Behaviour</b>                                          |      |     |     |      |    |     |      |    |    |      |     |    |      |    |    |
| Stereotypies                                              |      |     |     |      |    |     |      |    |    |      |     |    | 5%   | 7% | 5% |
| Pigs manipulating pen/floor                               |      |     |     |      |    |     |      |    |    |      |     |    | 4%   | 5% | 4% |
| Pigs manipulating enrichment                              |      |     |     |      |    |     |      |    |    |      |     |    | 5%   | 7% | 5% |
| Pigs manipulating other pigs                              |      |     |     |      |    |     |      |    |    |      |     |    | 6%   | 8% | 6% |
| <b>Water provision</b>                                    |      |     |     |      |    |     |      |    |    |      |     |    |      |    |    |
| Automatic drinking system                                 | 5%   | 15% | 5%  |      |    |     |      |    |    |      |     |    |      |    |    |
| Natural drinking behaviour                                | 6%   | 18% | 6%  |      |    |     |      |    |    |      |     |    |      |    |    |
| Sufficient ratio of number of pigs per number of drinkers | 8%   | 23% | 8%  |      |    |     |      |    |    |      |     |    |      |    |    |
| Availability of drinkers, when feeding                    | 3%   | 10% | 3%  |      |    |     |      |    |    |      |     |    |      |    |    |
| Water access for piglets                                  | 6%   | 0%  | 6%  |      |    |     |      |    |    |      |     |    |      |    |    |
| <b>Roughage</b>                                           |      |     |     |      |    |     |      |    |    |      |     |    |      |    |    |
| Quality of roughage                                       | 14%  | 33% | 14% |      |    |     |      |    |    |      |     |    | 3%   | 5% | 3% |
| <b>Enrichment</b>                                         |      |     |     |      |    |     |      |    |    |      |     |    |      |    |    |
| Quality of enrichment                                     |      |     |     |      |    |     |      |    |    |      |     |    | 4%   | 6% | 4% |
| Soiled enrichment                                         |      |     |     |      |    |     |      |    |    |      |     |    | 3%   | 5% | 3% |
| Access to enrichment for an adequate number of pigs       |      |     |     |      |    |     |      |    |    |      |     |    | 4%   | 6% | 4% |
| Access to enrichment in farrowing pen                     |      |     |     |      |    |     |      |    |    |      |     |    | 4%   | 0% | 4% |
| <b>Creep area</b>                                         |      |     |     |      |    |     |      |    |    |      |     |    |      |    |    |
| Proper creep area (suckling piglets and weaners)          |      |     |     | 12%  | 0% | 12% |      |    |    |      |     |    |      |    |    |

Continued on next page

**Supplementary Material Table S12: Contribution of animal health and welfare indicators to the respective themes in percentage (B = Breeding farms, F = Finishing farms, BF = Breeding-to-finishing farms). Part II**

|                                               | AHW1 |    |     | AHW2 |     |     | AHW3 |     |     | AHW4 |     |     | AHW5 |     |     |
|-----------------------------------------------|------|----|-----|------|-----|-----|------|-----|-----|------|-----|-----|------|-----|-----|
|                                               | B    | F  | BF  | B    | F   | BF  | B    | F   | BF  | B    | F   | BF  | B    | F   | BF  |
| <b>Floor quality</b>                          |      |    |     |      |     |     |      |     |     |      |     |     |      |     |     |
| Thickness of bedding                          |      |    |     | 3%   | 5%  | 3%  |      |     |     |      |     |     |      |     |     |
| Size of bedded area                           |      |    |     | 4%   | 6%  | 4%  |      |     |     |      |     |     |      |     |     |
| Size of slatted area                          |      |    |     | 5%   | 6%  | 5%  |      |     |     |      |     |     |      |     |     |
| Dirtiness of lying area                       |      |    |     | 4%   | 6%  | 4%  |      |     |     |      |     |     |      |     |     |
| Amount of bedding per animal and day          |      |    |     | 2%   | 3%  | 2%  |      |     |     |      |     |     |      |     |     |
| <b>Space allowance</b>                        |      |    |     |      |     |     |      |     |     |      |     |     |      |     |     |
| Total indoor area per pig                     |      |    |     | 14%  | 19% | 14% |      |     |     |      |     |     | 12%  | 15% | 12% |
| Total outdoor area per pig                    |      |    |     | 6%   | 8%  | 6%  |      |     |     |      |     |     | 5%   | 6%  | 5%  |
| <b>Pasture</b>                                |      |    |     |      |     |     |      |     |     |      |     |     |      |     |     |
| Paddocks with sufficient shelter              |      |    |     | 0%   | 0%  | 0%  |      |     |     |      |     |     |      |     |     |
| Vegetation cover of paddocks - gestating sows | 0%   | 0% | 0%  |      |     |     |      |     |     |      |     |     | 4%   | 5%  | 4%  |
| Pasture area per pig - gestating sows         | 0%   | 0% | 0%  |      |     |     |      |     |     |      |     |     | 4%   | 5%  | 4%  |
| Interval of moving to fresh pasture           |      |    |     |      |     |     | 0%   | 0%  | 0%  |      |     |     |      |     |     |
| Interval of moving huts on field              |      |    |     |      |     |     | 0%   | 0%  | 0%  |      |     |     |      |     |     |
| Access to pasture                             |      |    |     |      |     |     |      |     |     |      |     |     | 4%   | 5%  | 4%  |
| <b>Restricted normal behaviour</b>            |      |    |     |      |     |     |      |     |     |      |     |     |      |     |     |
| Confinement during lactation                  |      |    |     | 7%   | 0%  | 7%  |      |     |     |      |     |     | 4%   | 0%  | 4%  |
| Confinement in service area                   |      |    |     | 5%   | 0%  | 5%  |      |     |     |      |     |     | 4%   | 0%  | 4%  |
| Use of hormones to synchronise estrus/births  |      |    |     |      |     |     |      |     |     |      |     |     | 2%   | 0%  | 2%  |
| Use of hormones to trigger/induce births      |      |    |     |      |     |     |      |     |     |      |     |     | 2%   | 0%  | 2%  |
| Use of Oxytocin during birth (not after)      |      |    |     |      |     |     |      |     |     |      |     |     | 2%   | 0%  | 2%  |
| Nose rings                                    |      |    |     |      |     |     |      |     |     |      |     |     | 8%   | 0%  | 8%  |
| <b>Hospitalisation</b>                        |      |    |     |      |     |     |      |     |     |      |     |     |      |     |     |
| Pigs needing hospitalisation                  |      |    |     |      |     |     | 8%   | 8%  | 8%  | 20%  | 27% | 20% |      |     |     |
| Suitable sick pens                            |      |    |     | 12%  | 16% | 12% | 6%   | 6%  | 6%  |      |     |     |      |     |     |
| <b>Mortality</b>                              |      |    |     |      |     |     |      |     |     |      |     |     |      |     |     |
| Mortality                                     | 11%  | 0% | 11% |      |     |     | 29%  | 29% | 29% |      |     |     |      |     |     |
| Age at weaning                                | 10%  | 0% | 10% |      |     |     |      |     |     |      |     |     |      |     |     |
| Number of piglets born alive per sow and year | 7%   | 0% | 7%  |      |     |     |      |     |     |      |     |     |      |     |     |

Continued on next page

**Supplementary Material Table S12: Contribution of animal health and welfare indicators to the respective themes in percentage (B = Breeding farms, F = Finishing farms, BF = Breeding-to-finishing farms). Part III**

|                                                                                          | AHW1 |   |    | AHW2 |     |    | AHW3 |     |    | AHW4 |     |     | AHW5        |   |    |
|------------------------------------------------------------------------------------------|------|---|----|------|-----|----|------|-----|----|------|-----|-----|-------------|---|----|
|                                                                                          | B    | F | BF | B    | F   | BF | B    | F   | BF | B    | F   | BF  | B           | F | BF |
| <b>Treatments</b>                                                                        |      |   |    |      |     |    |      |     |    |      |     |     |             |   |    |
| Antibiotic MMA treatment                                                                 |      |   |    |      |     |    | 2%   | 0%  | 2% |      |     |     |             |   |    |
| Parasite treatment                                                                       |      |   |    |      |     |    | 3%   | 4%  | 3% |      |     |     |             |   |    |
| Antibiotic diarrhoea treatment                                                           |      |   |    | 6%   | 0%  | 6% | 4%   | 0%  | 4% |      |     |     |             |   |    |
| Antibiotic respiratory disease treatment                                                 |      |   |    | 6%   | 16% | 6% | 5%   | 10% | 5% |      |     |     |             |   |    |
| <b>Mutilations</b>                                                                       |      |   |    |      |     |    |      |     |    |      |     |     |             |   |    |
| Tail docking                                                                             |      |   |    |      |     |    |      |     |    | 11%  | 33% | 11% |             |   |    |
| Nose rings                                                                               |      |   |    |      |     |    |      |     |    | 11%  | 0%  | 11% |             |   |    |
| Teeth clipping or grinding                                                               |      |   |    |      |     |    |      |     |    | 4%   | 0%  | 4%  |             |   |    |
| <b>Castration</b>                                                                        |      |   |    |      |     |    |      |     |    |      |     |     |             |   |    |
| Castration                                                                               |      |   |    |      |     |    |      |     |    | 17%  | 0%  | 17% |             |   |    |
| Age at surgical castration                                                               |      |   |    |      |     |    |      |     |    | 8%   | 0%  | 8%  |             |   |    |
| <b>Quarantine</b>                                                                        |      |   |    |      |     |    |      |     |    |      |     |     |             |   |    |
| All-in-all-out per room                                                                  |      |   |    |      |     |    | 7%   | 9%  | 7% |      |     |     |             |   |    |
| Number of sources (farms) where pigs are bought in                                       |      |   |    |      |     |    | 4%   | 6%  | 4% |      |     |     |             |   |    |
| Proper quarantine                                                                        |      |   |    |      |     |    | 4%   | 0%  | 4% |      |     |     |             |   |    |
|                                                                                          |      |   |    |      |     |    |      |     |    |      |     |     | <b>AHW6</b> |   |    |
| <b>Negative characteristics</b>                                                          |      |   |    |      |     |    |      |     |    |      |     |     |             |   |    |
| My sows/ pigs are difficult to move (e.g. from the gestation unit to the farrowing unit) |      |   |    |      |     |    |      |     |    |      |     |     | 15%         |   |    |
| My sows/ pigs are often nervous                                                          |      |   |    |      |     |    |      |     |    |      |     |     | 15%         |   |    |
| <b>One welfare</b>                                                                       |      |   |    |      |     |    |      |     |    |      |     |     |             |   |    |
| When my well-being is at risk the welfare of my pig is at risk                           |      |   |    |      |     |    |      |     |    |      |     |     | 15%         |   |    |
| Good overall farm performance is directly linked to good sow/ pig welfare                |      |   |    |      |     |    |      |     |    |      |     |     | 15%         |   |    |
| <b>Positive characteristics</b>                                                          |      |   |    |      |     |    |      |     |    |      |     |     |             |   |    |
| My sows/ pigs are a pleasure to work with                                                |      |   |    |      |     |    |      |     |    |      |     |     | 10%         |   |    |
| It is important to talk to and/or friendly touch (stroke, pet, scratch) your pigs        |      |   |    |      |     |    |      |     |    |      |     |     | 10%         |   |    |
| Importance to avoid force when handling pigs                                             |      |   |    |      |     |    |      |     |    |      |     |     | 10%         |   |    |
| You can calm down sows/ pigs by talking to them calmly                                   |      |   |    |      |     |    |      |     |    |      |     |     | 10%         |   |    |

**Supplementary Material Table S13: Interobserver Reliability Test (IOR)**

Before start of farm visits, two experienced pig researchers (CM, CL) trained two observers (AR; JH). This included classroom training, joint scoring of animals and discussions on 2 farms in Austria. Already straight after this training, interobserver reliability (IOR) was tested on-farm for several animal based indicators. This was followed by another IOR observer session in Germany (2 days, 2 farms) and a third two-day observer session in Austria (2 farms) with the two observers present and independent scoring of pigs. Visited farms included three research farms and three practical farms. After farm visit one, IOR was repeated for selected animal based indicators.

IOR was calculated as exact agreement between two observers and expressed as weighted Kappa, PABAK and percentage agreement and sufficient agreement was achieved. For most of the parameters, only farms with zero or low median prevalence were available for inter-observer tests. Furthermore, assessment of group level presents specific challenges, as pigs are constantly moving, different body sizes might be visible and some parameters can change during assessments (e.g. soiling, lesions). Therefore, IOR testing was complemented with pictures and videos on an individual animal basis for several parameters.

Results for weighted kappa and percentage agreement were categorized as followed:

|                             |          |          |
|-----------------------------|----------|----------|
| <b>Kappa</b>                | <0,4     | poor     |
|                             | 0,4- 0,6 | moderate |
|                             | >=0,6    | good     |
| <b>Percentage agreement</b> | <60%     | poor     |
|                             | 60-80%   | moderate |
|                             | >=80%    | good     |

| Parameter                      | Animal category | Level | N  | Percentage | (Weighted) Kappa<br>before V1 | PABAK | Prevalence index | Percentage | (Weighted) Kappa<br>after V1 | PABAK | Prevalence index |
|--------------------------------|-----------------|-------|----|------------|-------------------------------|-------|------------------|------------|------------------------------|-------|------------------|
| Body condition score ok        | Gest            | A-OF  | 30 | 97%        | 0.65                          | 0.93  | 0.90             |            |                              |       |                  |
| Body condition score too fat   | Gest            | A-OF  | 30 | 97%        | 0.65                          | 0.93  | -0.90            |            |                              |       |                  |
| Body condition score too thin  | Gest            | A-OF  | 30 | 100%       |                               | 1.00  | -1.00            |            |                              |       |                  |
| Body lesions                   | Gest            | A-OF  | 30 | 100%       | 1.00                          | 1.00  | -0.93            |            |                              |       |                  |
| Body lesions                   | Finish          | G-OF  | 26 | 88%        | 0.70                          | 0.63  | -0.69            |            |                              |       |                  |
| Body lesions                   | Finish          | A-P   | 68 |            |                               |       |                  | 67%        | 0.34                         | 0.34  | -0.28            |
| Ear lesions                    | Finish          | G-OF  | 26 | 100%       |                               | 1.00  | -1.00            |            |                              |       |                  |
| Ear lesions                    | Finish          | A-P   | 31 | 100%       | 1.00                          | 1.00  | -0.23            | 97%        | 0.94                         | 0.93  | -0.23            |
| Ectoparasites                  | Gest            | A-OF  | 30 | 100%       |                               | 1.00  | -1.00            |            |                              |       |                  |
| Ectoparasites                  | Gest            | A-P   | 11 | 91%        | 0.00                          | 0.82  | 0.91             |            |                              |       |                  |
| Ectoparasites                  | Finish          | G-OF  | 26 | 100%       |                               | 1.00  | -1.00            |            |                              |       |                  |
| Lameness                       | Gest            | G-OF  | 30 | 100%       | 1.00                          | 1.00  | -0.93            |            |                              |       |                  |
| Lameness                       | Gest            | A-V   | 9  | 100%       | 1.00                          | 1.00  | -0.33            | 100%       | 1.00                         | 1.00  | -0.33            |
| Lameness                       | Finish          | G-OF  | 26 | 81%        | 0.50                          | 0.54  | -0.69            |            |                              |       |                  |
| Nose rings                     | Gest            | A-OF  | 30 | 100%       |                               | 1.00  | -1.00            |            |                              |       |                  |
| Nose rings                     | Lact            | A-OF  | 10 | 100%       |                               | 1.00  | -1.00            |            |                              |       |                  |
| Pigs requiring hospitalization | Gest            | A-OF  | 30 | 100%       |                               | 1.00  | -1.00            |            |                              |       |                  |
| pigs requiring hospitalization | Finish          | G-OF  | 26 | 88%        | 0.34                          | 0.77  | -0.81            |            |                              |       |                  |
| Runts                          | Lact            | G-OF  | 10 | 70%        | 0.67                          | 0.40  | -0.70            |            |                              |       |                  |
| Runts                          | Wean            | G-OF  | 26 | 100%       |                               | 1.00  | -1.00            |            |                              |       |                  |
| Runts                          | Lact and Wean   | G-P   | 31 |            |                               |       |                  | 94%        | 0.89                         | 0.88  | -0.02            |
| Shoulder lesions               | Gest            | A-OF  | 30 | 100%       |                               | 1.00  | -1.00            |            |                              |       |                  |
| Shoulder lesions               | Gest            | A-P   | 30 | 86%        | 0.71                          | 0.72  | -0.24            | 97%        | 0.93                         | 0.93  | -0.23            |

Continued on next page

Gest = gestating sows, Lact = Lactating sows, Wean = weaners, Finish = Finisher. A=animal level, G=group level, OF=on farm, P=pictures, V=videos

| Parameter                                          | Animal category | Level | N  | Percentage | (Weighted) Kappa<br>before V1 | PABAK | Prevalence index | Percentage | (Weighted) Kappa<br>after V1 | PABAK | Prevalence index |
|----------------------------------------------------|-----------------|-------|----|------------|-------------------------------|-------|------------------|------------|------------------------------|-------|------------------|
| Tail damage<br>freshness: score 1<br>(older)       | Finish          | G-OF  | 26 | 80%        | 0.43                          | 0.60  | -0.72            |            |                              |       |                  |
| Tail damage<br>freshness: score 2<br>(fresh)       | Finish          | G-OF  | 26 | 81%        | 0.45                          | 0.62  | -0.50            |            |                              |       |                  |
| Tail damage<br>type: score 1<br>(mild)             | Finish          | G-OF  | 26 | 80%        | 0.42                          | 0.60  | -0.72            |            |                              |       |                  |
| Tail damage<br>type: score 2<br>(severe)           | Finish          | G-OF  | 26 | 96%        | 0.92                          | 0.77  | -0.65            |            |                              |       |                  |
| Tail lesion                                        | Finish          | A-P   | 45 |            |                               |       |                  | 75%        | 0.72                         | 0.00  | -0.50            |
| Tail length:<br>shortened                          | Finish          | G-OF  | 26 | 100%       |                               | -1.00 | 0.00             |            |                              |       |                  |
| Tail length:<br>stump                              | Finish          | G-OF  | 26 | 77%        | 0.41                          | 0.54  | -0.69            |            |                              |       |                  |
| Tail length                                        | Finish          | A-P   | 44 |            |                               |       |                  | 89%        | 0.87                         | 0.23  | -0.02            |
| Vulva deformed                                     | Gest            | A-OF  | 30 | 93%        | 0.63                          | 0.87  | -0.80            |            |                              |       |                  |
| Vulva lesion                                       | Gest            | A-OF  | 30 | 100%       | 1.00                          | 1.00  | -0.93            |            |                              |       |                  |
| n pigs<br>manipulating<br>enrichment               | Finish          | G-OF  | 24 | 100%       | 1.00                          | 0.90  | -0.76            |            |                              |       |                  |
| n pigs<br>manipulating<br>floor or pen<br>fixtures | Finish          | G-OF  | 24 | 79%        | 0.44                          | 0.58  | -0.63            |            |                              |       |                  |
| n pigs<br>manipulating<br>other pigs               | Finish          | G-OF  | 24 | 100%       | 1.00                          | 0.83  | -0.75            |            |                              |       |                  |
| n pigs<br>performing<br>stereotypies<br>(scan)     | Finish          | G-OF  | 24 | 75%        | 0.56                          | 0.42  | -0.54            |            |                              |       |                  |

Gest = gestating sows, Lact = Lactating sows, Wean = weaners, Finish = Finisher. A=animal level, G=group level, OF=on farm, P=pictures, V=videos
